# Supplementary material for: Effectiveness and cost-effectiveness of guided self-help for depression for autistic adults: the Autism Depression Trial (ADEPT-2) – protocol for a multicentre, randomised controlled trial of a remotely delivered low-intensity intervention
Source: PubMed Central journal article supplement (PMC11580278; doi:10.1136/bmjopen-2024-084729), 2024-11-19
Supplement: bmjopen-14-11-s004.pdf [file bmjopen-14-11-s004.pdf]

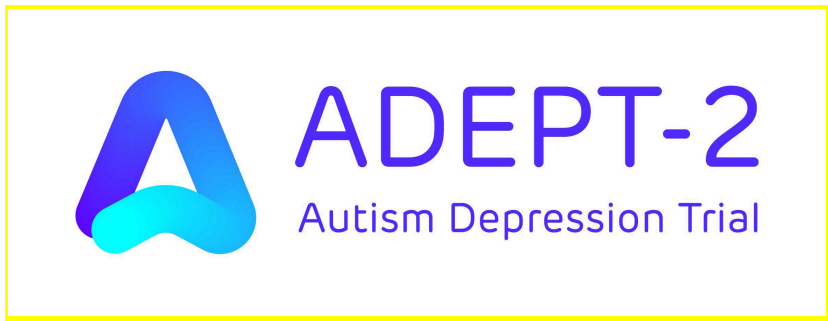

IRAS ID: 310263

Centre Number: \_\_\_\_\_

Study Number: \_\_\_\_\_

Participant Identification Number for this trial: \_\_\_\_\_

**ADEPT-2 STUDY CONSENT FORM**

**Title of Project: Autism Depression Trial- 2 (ADEPT-2)**

**Name of Researcher:** \_\_\_\_\_

**Please initial box**

- 1. I confirm that I have read the information sheet dated..... (version.....) for the above study. I have had the opportunity to consider the information, ask questions and have had these answered satisfactorily.
- 2. I understand that my participation is voluntary and that I am free to withdraw at any time without giving any reason, without my medical care or legal rights being affected.
- 3. I understand that relevant sections of my medical notes and data collected during the study, may be looked at by individuals from the University of Bath and the University of Bristol, from regulatory authorities or from the NHS Trust, where it is relevant to my taking part in this research. I give permission for these individuals to have access to my records.
- 4. I agree to my General Practitioner being informed of my participation in the study. / I agree to my General Practitioner being involved in the study, including any necessary exchange of information about me between my GP and the research team.
- 5. I understand that the information held and maintained by [insert site name] and the ADEPT-2 study team at the University of Bristol may be used to help contact me or  provide information about the results of the study. **[please continue to page 2]**

---

**OPTIONAL:**

6. I agree to the audio recording of treatment sessions that may be shared with researchers at the University of Bath to ensure that the treatment is being delivered as intended.
7. I agree to have my contact details shared with a qualitative researcher so they can contact me to arrange a study interview about my experience of the study and the support I have received.
8. I agree to have my study interview audio recorded to help with analysis and I understand that my responses will remain anonymous.
9. I agree that direct quotes and parts of voice modified audio-recordings from my study interview may be used for training, teaching, research and publication purposes and I understand that any quotes/modified audio-recordings used will remain anonymous.
10. I understand that the information collected about me will be used to support other research in the future, and may be shared anonymously with other researchers.
11. I give my consent to receive a copy of the results at the end of the study
12. I give my consent to be contacted about other research opportunities in the future
- 
13. I agree to take part in the above study.

\_\_\_\_\_  
Name of Participant                      Date                      Signature

\_\_\_\_\_  
Name of Person  
seeking consent                      Date                      Signature
